# Supplementary material
Source: Springer Nature journal article supplement (https://www.springermedizin.de/resource/supplementary/13256_2014_3007_MOESM3_ESM.pdf/9651068)
Supplement: MOESM3 [file 9651068]

Figure 2. The patient's clinical course over the first 7 days after his admission

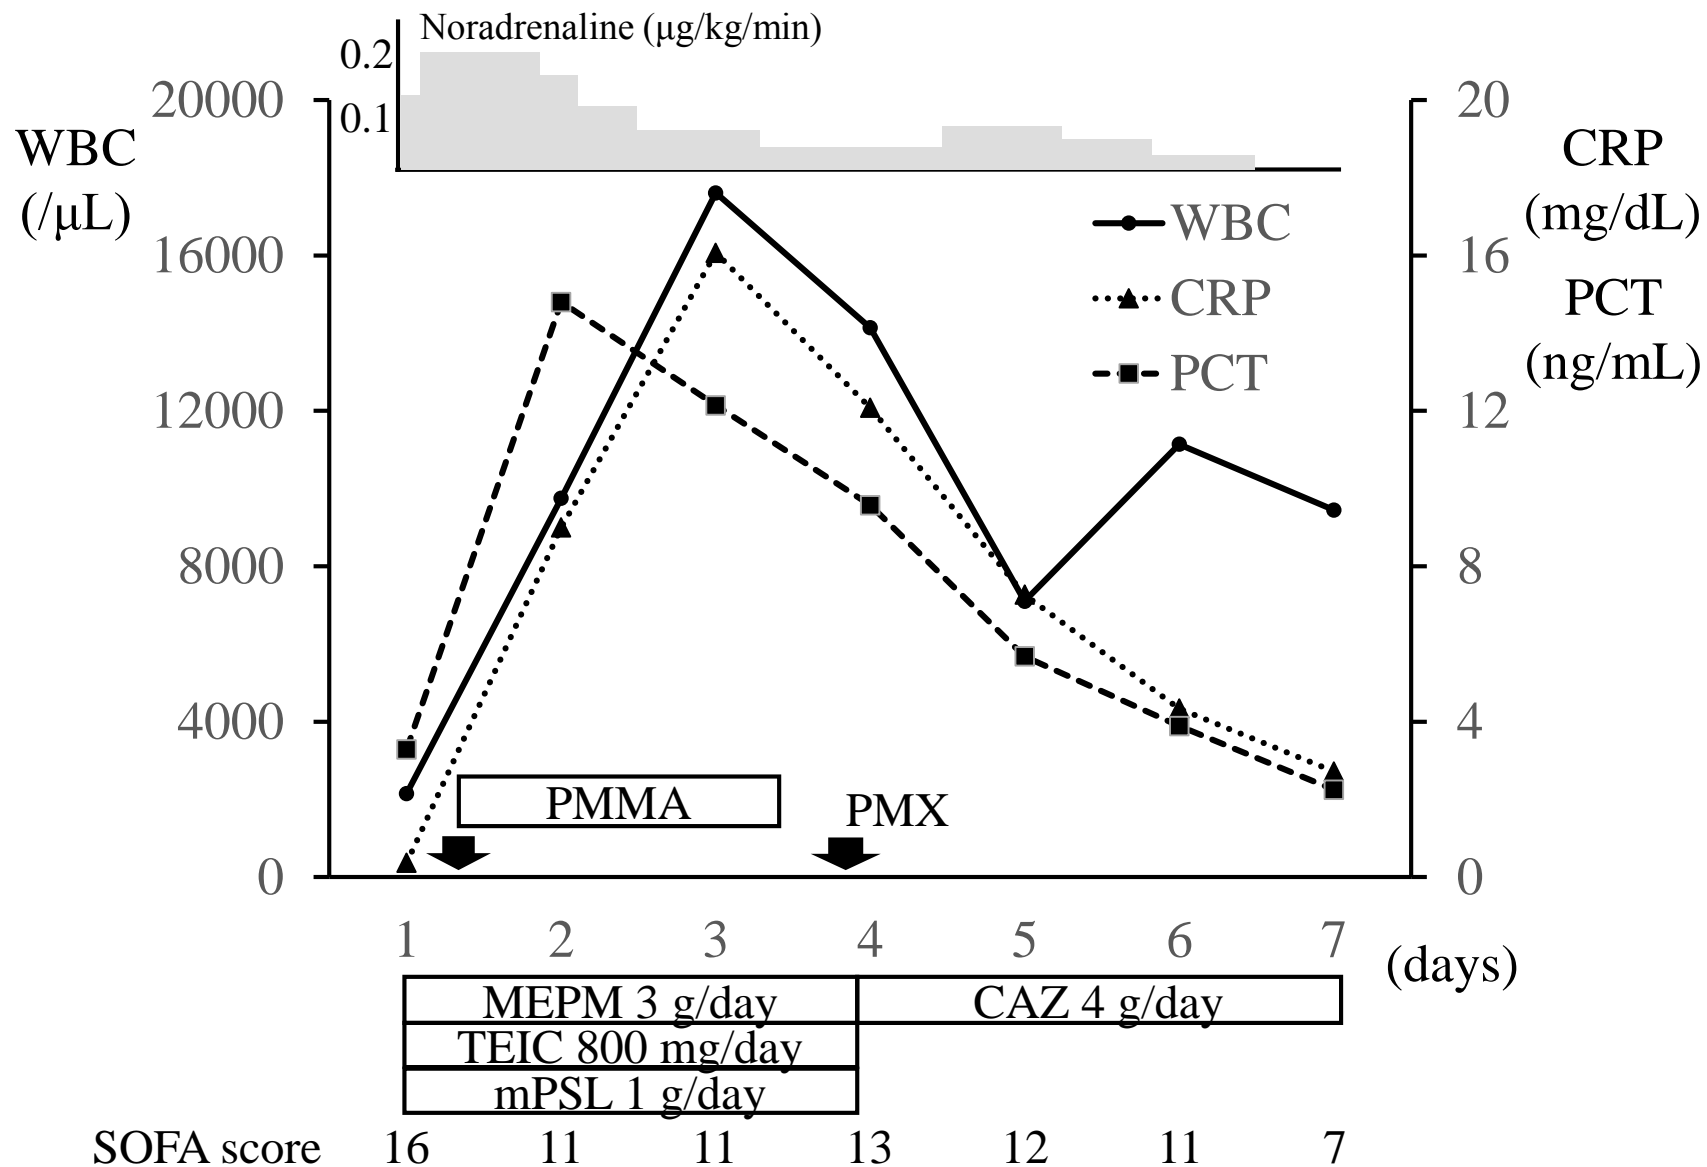

WBC, white blood cell count; CRP, C-reactive protein; PCT, procalcitonin; PMMA, polymethylmethacrylate; PMX, polymyxin B hemoperfusion; MEPM, meropenem; TEIC, teicoplanin; CAZ, ceftazidime; mPSL, methylprednisolone
